# Supplementary figures and images for: Highly Sensitive and Selective Fluorescence “Turn-On” Detection of Pb (II) Based on Fe3O4@Au–FITC Nanocomposite
Source: MDPI journal article supplement (doi:10.3390/molecules26113180), 2021-05-26

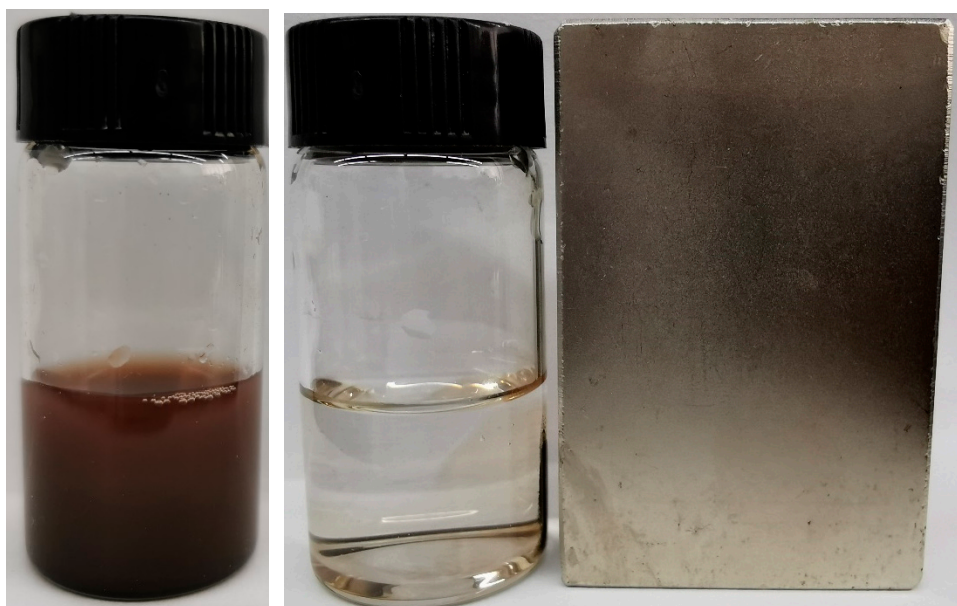

**Figure S1.** Magnetic separation of the  $\text{Fe}_3\text{O}_4@\text{Au}$ -FITC nanocomposites.

Supplement: s1 [file s1]
